# Supplementary material for: Rice sHsp genes: genomic organization and expression profiling under stress and development
Source: PubMed Central journal article supplement (PMC2746236; doi:10.1186/1471-2164-10-393), 2009-08-24
Supplement: 1471-2164-10-393-S5.pdf [file 1471-2164-10-393-S5.pdf]

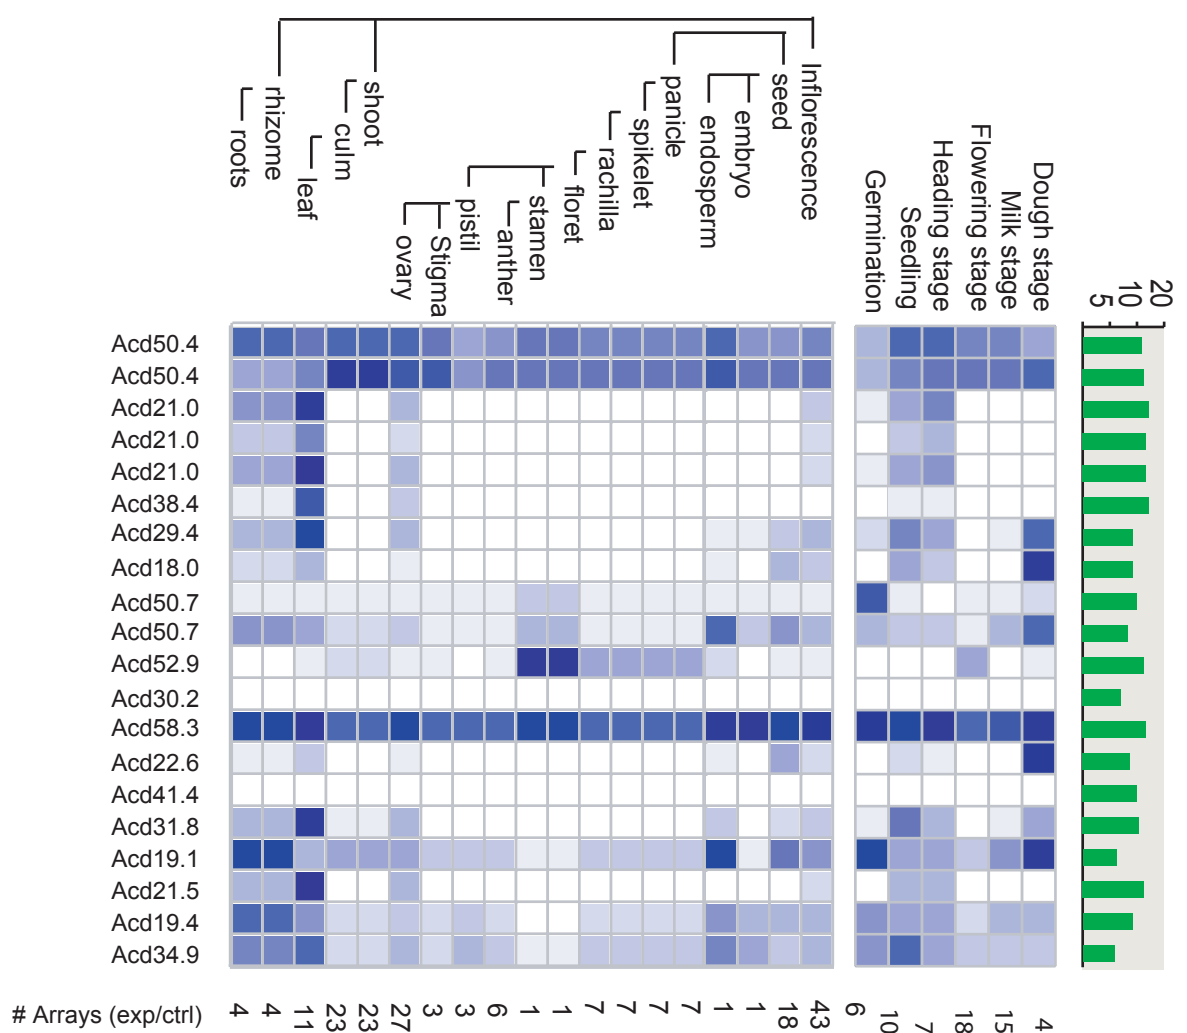

**Supplemental figure 3 (A).** Microarray based expression profiles of Acd genes of rice during developmental stages of rice plant. Expression pattern of Acd genes during developmental stages are presented as heat maps in blue /white colors generated using meta-analysis tool at Genevestigator ([www.genevestigator.ethz.ch](http://www.genevestigator.ethz.ch)). The colors reflect mean signal values where the darkest color corresponds to stronger expression.

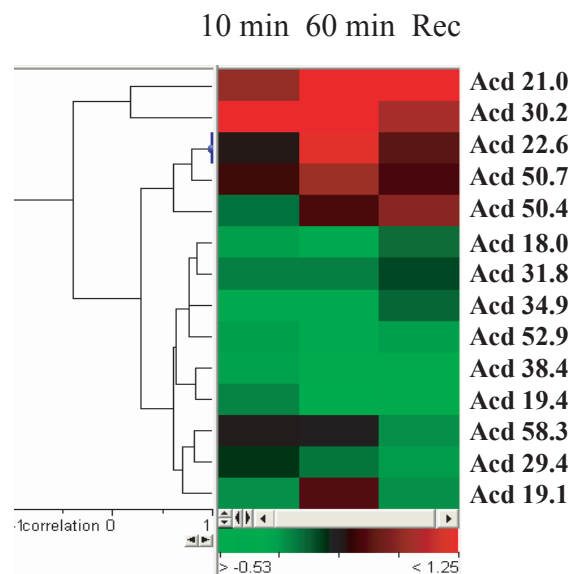

**Supplemental figure 3 (B).** Microarray based expression profiles of Acd genes of rice under heat stress. Leaves from one month old plants were given stress at 42°C. Samples were harvested after 10 min and 1 h of HT treatment and 30 min recovery following 1 h HT. Control samples were kept at 26°C. The color bar represents  $\log_2$  expression values.
