# Supplementary material for: Rice sHsp genes: genomic organization and expression profiling under stress and development
Source: PubMed Central journal article supplement (PMC2746236; doi:10.1186/1471-2164-10-393), 2009-08-24
Supplement: 1471-2164-10-393-S7.pdf [file 1471-2164-10-393-S7.pdf]

| NAME                 | SITES (5'→3' )                                                                                      | START |
|----------------------|-----------------------------------------------------------------------------------------------------|-------|
| Hsp17.9A-CI          | CTCGAGTTTG <b>TTC</b> TG <b>GACGATTC</b> GGGTCGTGCT                                                 | 270   |
| Hsp17.4-CI           | TACTG <b>GAA</b> GT <b>TTT</b> TGC <b>TTC</b> CG <b>GATAGTTC</b> TCGTTTG <b>TTC</b> GTT <b>AA</b> T | 348   |
|                      | GAAGTGGTC <b>TTC</b> TG <b>GATTG</b> <b>TTC</b> TAGGCCTGCTT                                         | 302   |
|                      | AGAGAGC <b>TTG</b> TT <b>GATCTTTC</b> GA                                                            | 520   |
| Hsp18.0-CI           | AAGCAGGCCTA <b>GAA</b> CA <b>ATC</b> CAG <b>AA</b> GACCACTTC                                        | 234   |
| Hsp17.7-CI           | AGCTAGAGTA <b>GAA</b> AG <b>TTC</b> CC <b>GAA</b> TTACTAAAA                                         | 507   |
|                      | CCACAGGGCCA <b>AA</b> AG <b>TTC</b> TG <b>GAA</b> GGCACTC <b>GATGATTC</b>                           | 250   |
| <b>Hsp16.9C-CI</b>   | AT <b>GAA</b> TACT <b>TC</b> TAG <b>G</b> CAAATTAAGGTGAG                                            | 273   |
|                      | TGGAGCGACG <b>GAA</b> GC <b>GAA</b> GCAGATCGAGTGTGCTG                                               | 210   |
|                      | <b>AG</b> GAAAG <b>TC</b> CAG <b>AGATTC</b> AG <b>G</b> CAGATTAG                                    | 157   |
| <b>Hsp16.9A-CI</b>   | TCGAGACGCC <b>TC</b> AA <b>GAA</b> CGTCCATTGCGCAGCTCC                                               | 175   |
|                      | GAAGCAAAGCCTT <b>TTC</b> TAG <b>GAA</b> GGGAGCAGATCAA                                               | 240   |
| Hsp16.9B-CI          | GAGATGCT <b>TTC</b> AA <b>G</b> ACCAAGTTCTGAAGAA                                                    | 152   |
| <b>Hsp16.6-CVIII</b> | <b>TC</b> CAG <b>AA</b> CAAGCAG <b>GAA</b> ACCTCATCACTCACC                                          | 217   |
|                      | ACTCC <b>TC</b> GACCC <b>TTC</b> AC <b>G</b> ACGCATCCAA                                             | 188   |
| <b>Hsp17.9B-CIX</b>  | ACGCTGGAG <b>GAA</b> GAAGAAG <b>GAA</b> TGGCGCC <b>GAT</b> CGCC                                     | 310   |
| <b>Hsp23.6-III</b>   | AATTAT <b>GAA</b> TCACC <b>GAA</b> TGTACTCAGAAAAA                                                   | 583   |
| <b>Hsp17.8-CXI</b>   | <b>GAA</b> AACGCGAG <b>AA</b> ACTAC <b>CAGAA</b> AAATCGCGTGTTTC                                     | 214   |
|                      | ACACGCG <b>TTC</b> TC <b>GATCATTC</b> TCGCGCGCCACC                                                  | 97    |
| Hsp23.2-ER           | <b>GATCC</b> <b>TTC</b> TCTTTTCT <b>TTC</b> CGG <b>TC</b> TGTACAAT                                  | 510   |
|                      | CTC <b>GATCC</b> <b>TTC</b> GG <b>GAA</b> ACCTCTCCCGCCG                                             | 214   |
| <b>Hsp22.3-CVI</b>   | AGTG <b>GAA</b> ATCT <b>TC</b> CAG <b>AA</b> AAAGGAAAAAAG                                           | 194   |
| <b>Hsp18.8-CV</b>    | TTTAGATTT <b>ACA</b> <b>TTC</b> GT <b>GAA</b> ATAAACCAA                                             | 356   |

Manual analysis of promoters of sHsp genes.

In addition to MEME based analysis, sHsp genes were analyzed manually. The HSEs which were not identified in promoters by MEME analysis are displayed in the figure. Consensus nucleotides of HSEs are shown in pink font.
